# Supplementary material for: Establishment of pancreatic cancer cell lines with endoscopic ultrasound‐guided biopsy via conditionally reprogrammed cell culture
Source: PubMed Central journal article supplement (PMC6601705; doi:10.1002/cam4.2210), 2019-05-01
Supplement: CAM4-8-3339-s002.pdf [file CAM4-8-3339-s002.pdf]

Table S1. Relationship between procurement of the histologic core and the number of needle passes.

| Total number of passes |                              | n (%)      |
|------------------------|------------------------------|------------|
| 2 passes               | Total patients               | 16         |
|                        | Sample with a score $\geq 3$ | 14 (87.5%) |
| 3 passes               | Total patients               | 14         |
|                        | Sample with a score $\geq 3$ | 14 (100%)  |
| Overall                | Total patients               | 30         |
|                        | Sample with a score $\geq 3$ | 28 (93.3%) |



$^\dagger$ Mann-Whitney's U test
